# Supplementary material for: RNA-seq and ChIP-seq Identification of Unique and Overlapping Targets of GLI Transcription Factors in Melanoma Cell Lines
Source: MDPI journal article supplement (doi:10.3390/cancers14184540), 2022-09-19
Supplement: s1 [file s1]

**Supplementary Table S1.** List of primer sequences used for qPCR

|                 |                                  |
|-----------------|----------------------------------|
| <i>KRT16</i>    | F: 5'-CTGAGACCTGGTTCCTGAGC-3'    |
|                 | R: 5'-GTTCTCCAGGGATGCTTTCA-3'    |
| <i>KRT17</i>    | F: 5'-CGGAGACAGAGAACCGCTAC-3'    |
|                 | R: 5'-TTCTTTCTTGACTGAGTCAGGTG-3' |
| <i>S100A9</i>   | F: 5'-CAGCTGGAACGCAACATAGA-3'    |
|                 | R: 5'-TCAGCTGCTTGTCTGCATT-3'     |
| <i>S100A7</i>   | F: 5'-TTCCCCAACTTCCTTAGTGC-3'    |
|                 | R: 5'-CCCAGCAAGGACAGAACTC-3'     |
| <i>GH1</i>      | F: 5'-CCTAGAGGAAGGCATCCAAA-3'    |
|                 | R: 5'-GCAGCCCGTAGTTCTTGAGTAG-3'  |
| <i>SOX9</i>     | F: 5'-AGTACCCGCACTTGACACAAC-3'   |
|                 | R: 5'-CGTTCTTCACCGACTTCCTC-3'    |
| <i>MRAS</i>     | F: 5'-CCTCATCGTCTACTCCGTCA-3'    |
|                 | R: 5'-CATTGAGAGGTGGGTCCTTG-3'    |
| <i>BIRC7</i>    | F: 5'-CGTCTGGCCTCCTTCTATGA-3'    |
|                 | R: 5'-CAGCAGCTGGGAGTGAGTCT-3'    |
| <i>IL1R2</i>    | F: 5'-TGGCACCTACGTCTGCACTA-3'    |
|                 | R: 5'-TACCCAGAGGTTGACAAGG-3'     |
| <i>EBI3</i>     | F: 5'-CAGCTTCGTGCCTTTCATAA-3'    |
|                 | R: 5'-TCCCCGTAGTCTGTGAGGTC-3'    |
| <i>HES1</i>     | F: 5'-TGAGCCAGCTGAAAACACTG-3'    |
|                 | R: 5'-CATTGATCTGGGTCATGCAG-3'    |
| <i>RET</i>      | F: 5'-CCACGCAAAGTGATGTATGG-3'    |
|                 | R: 5'-CCGCAAGGTCCAAGTAGTCT-3'    |
| <i>SPRY2</i>    | F: 5'-CTCGGCCAGAACGTGATT-3'      |
|                 | R: 5'-GGCAAAAAGAGGGACATGACAC-3'  |
| <i>SAMMSON</i>  | F: 5'-GGAAAGAGGAAGCCATGAGG-3'    |
|                 | R: 5'-ACTGCTGAGGACCCAGTTT-3'     |
| <i>FLG</i>      | F: 5'-GGCAAATCCTGAAGAATCCA-3'    |
|                 | R: 5'-TGCTTTCTGTGCTTGTGTCC-3'    |
| <i>RAB34</i>    | F: 5'-ATTACAAGGCCACCATGGA-3'     |
|                 | R: 5'-TGCAATGCATTTGAACCTCT-3'    |
| <i>CACNA2D2</i> | F: 5'-TCATACGCGGCTGTACAGAT-3'    |
|                 | R: 5'-ACAGGTCGATCTTCTTGGGG-3'    |
| <i>LAPTM5</i>   | F: 5'-TGCTAGCTCCTCAAGTCC-3'      |
|                 | R: 5'-AAGGACAGTGATGAAGGCGA-3'    |
| <i>LY6D</i>     | F: 5'-CTCCCAGACGACATCAGAGA-3'    |
|                 | R: 5'-GTGTTCTGTTGCTTGCAGAA-3'    |
| <i>RDH10</i>    | F: 5'-AGGCTGCTGAAAAGGATGGA-3'    |
|                 | F: 5'-GTCACGATGTACATGAGGCG-3'    |
| <i>STK32C</i>   | F: 5'-CAGGACGAGGAGGACATGTT-3'    |
|                 | R: 5'-GTGGCAATGTTGAAGTCGGT-3'    |
| <i>PTCH1</i>    | 5' TCCTCGTGTGCGCTGTCTTCCTTC 3'   |
|                 | 5' CGTCAGAAAGGCCAAAGCAACGTGA 3'  |
| <i>GLI1</i>     | F: 5'-CTTGTGGTCCCATGACTCT-3'     |
|                 | R: 5'-GTTGGGGCTGGACATATCAC-3'    |
| <i>GLI2</i>     | 5' GCCATCAAGACCGAGAGCTC 3'       |
|                 | 5' CGGCCCATGAGCAGGAATCC 3'       |
| <i>GLI3</i>     | 5' CACTACCTCAAAGCGGGAAG 3'       |
|                 | 5' TGTTGGACTGTGTGCCATTT 3'       |
