# Supplementary material for: RNA-seq and ChIP-seq Identification of Unique and Overlapping Targets of GLI Transcription Factors in Melanoma Cell Lines
Source: MDPI journal article supplement (doi:10.3390/cancers14184540), 2022-09-19
Supplement: s1 [file s1]

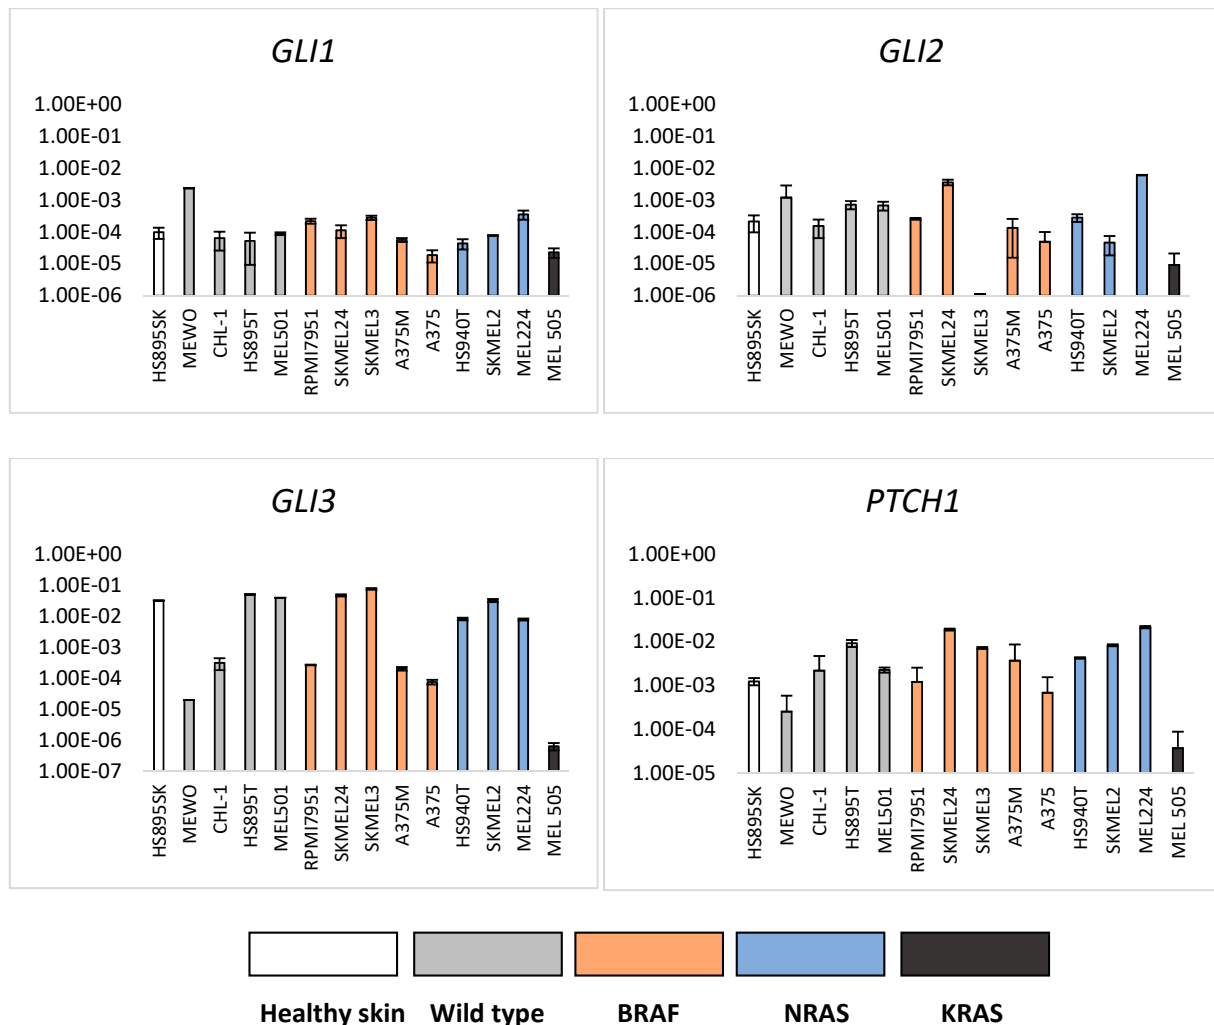

**Supplementary Figure S1.** HH-GLI pathway activity in melanoma cell lines. Average gene expression of *GLI1*, *GLI2*, *GLI3* and *PTCH1* in a panel of 14 melanoma cell lines. Expression is calculated as relative to the housekeeping gene *RPLP0*, and cell lines are grouped according to the mutational status of *BRAF*, *NRAS* and *KRAS* genes.

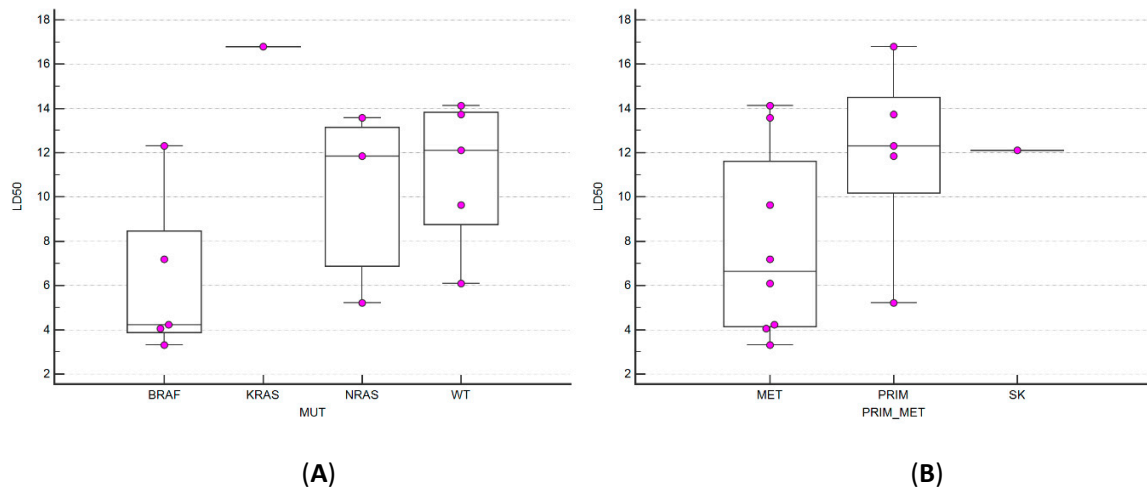

**Supplementary Figure S2.** GANT61 IC50 values. IC50 values of inhibitor GANT61 for the tested melanoma cell lines according to the mutation status **(A)** or primary/metastatic status **(B)**.

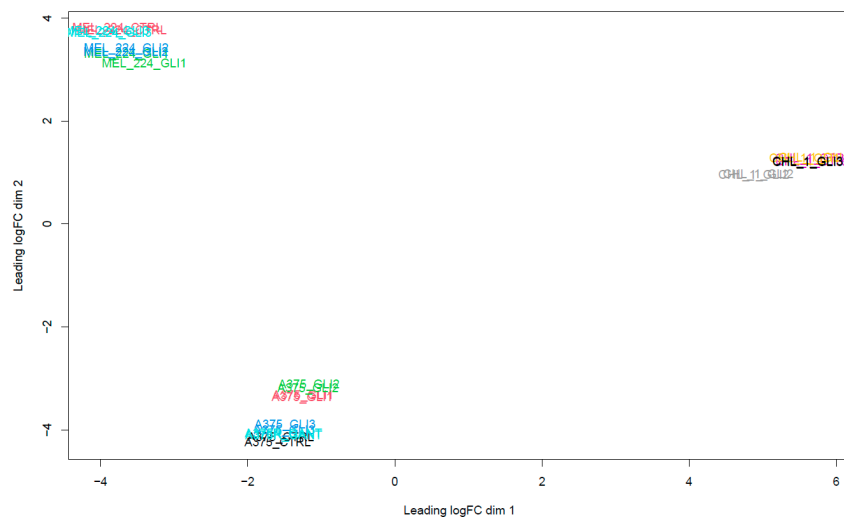

**Supplementary Figure S3.** MDS plot. MDS analysis for all samples used in RNA sequencing. Plot shows grouping according to three cell lines (CHL1, A375 and MEL224).

KEGG enrichment 0.01

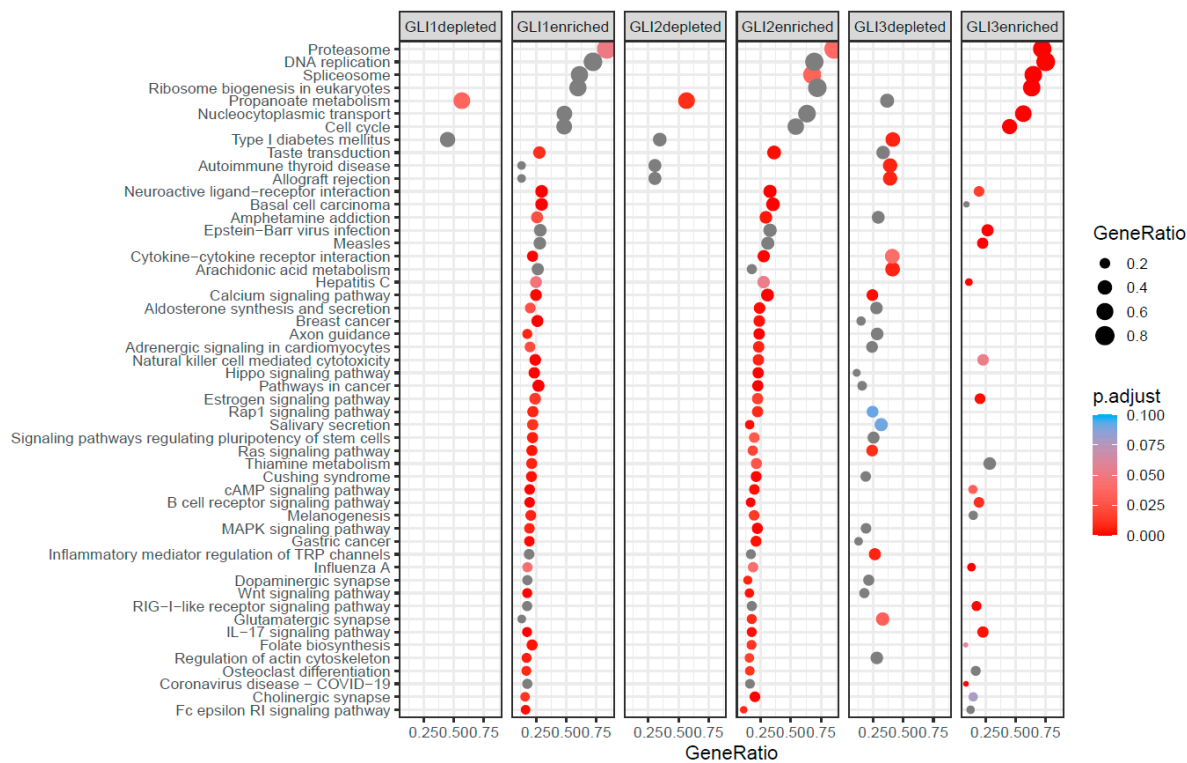

KEGG enrichment, FDR: 0.01

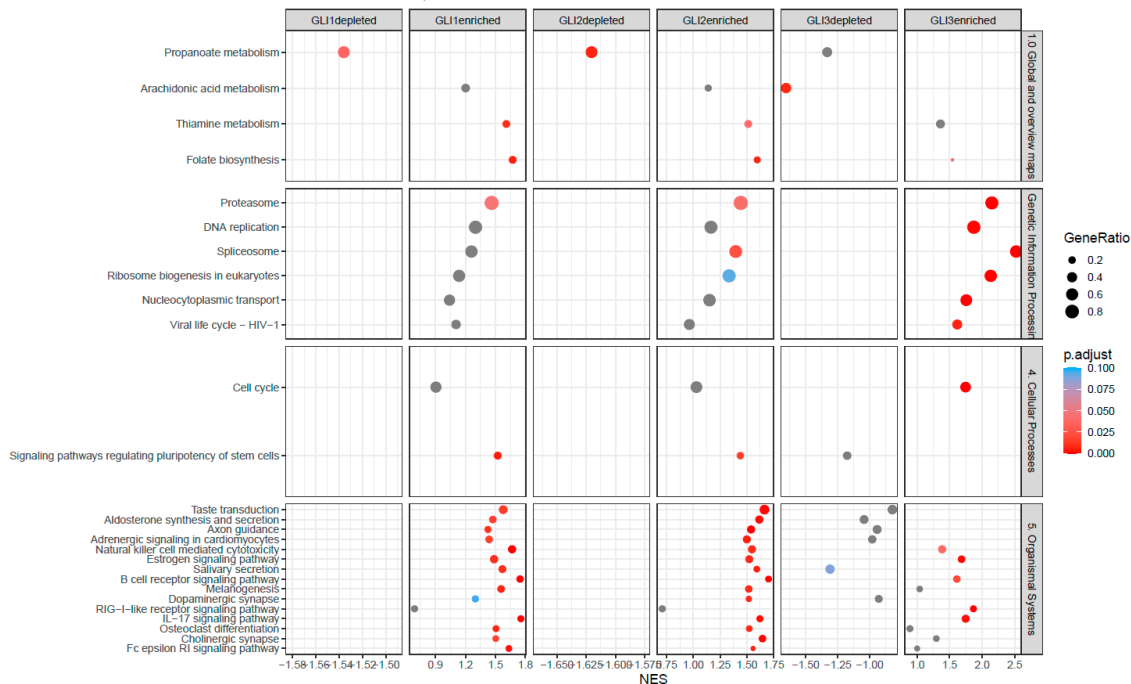

**Supplementary Figure S4.** KEGG pathway analysis. (A) all KEGG terms, (B) remaining KEGG categories not presented in Figure 2: Metabolism, Genetic information processing, Cellular processes and Organismal systems
